# Supplementary material for: Small GTPase Sar1 is crucial for proglutelin and α-globulin export from the endoplasmic reticulum in rice endosperm
Source: PubMed Central journal article supplement — J Exp Bot. 2013 May 16;64(10):2831–45. doi: 10.1093/jxb/ert128 (PMC3697955; doi:10.1093/jxb/ert128), 2013-05-16
Supplement: supp_ert128_jexbot098269_file001.pdf [file supp_ert128_jexbot098269_file001.pdf]

**Small GTPase Sar1 is crucial for proglutelin and  $\alpha$ -globulin export from endoplasmic reticulum in rice endosperm**

Lihong Tian, Ling Ling Dai, Zhi Jie Yin, Masako Fukuda, Toshihiro Kumamaru, Xiang Bai Dong, Xiu Ping Xu, and Le Qing Qu

*Journal of Experimental Botany* 2013

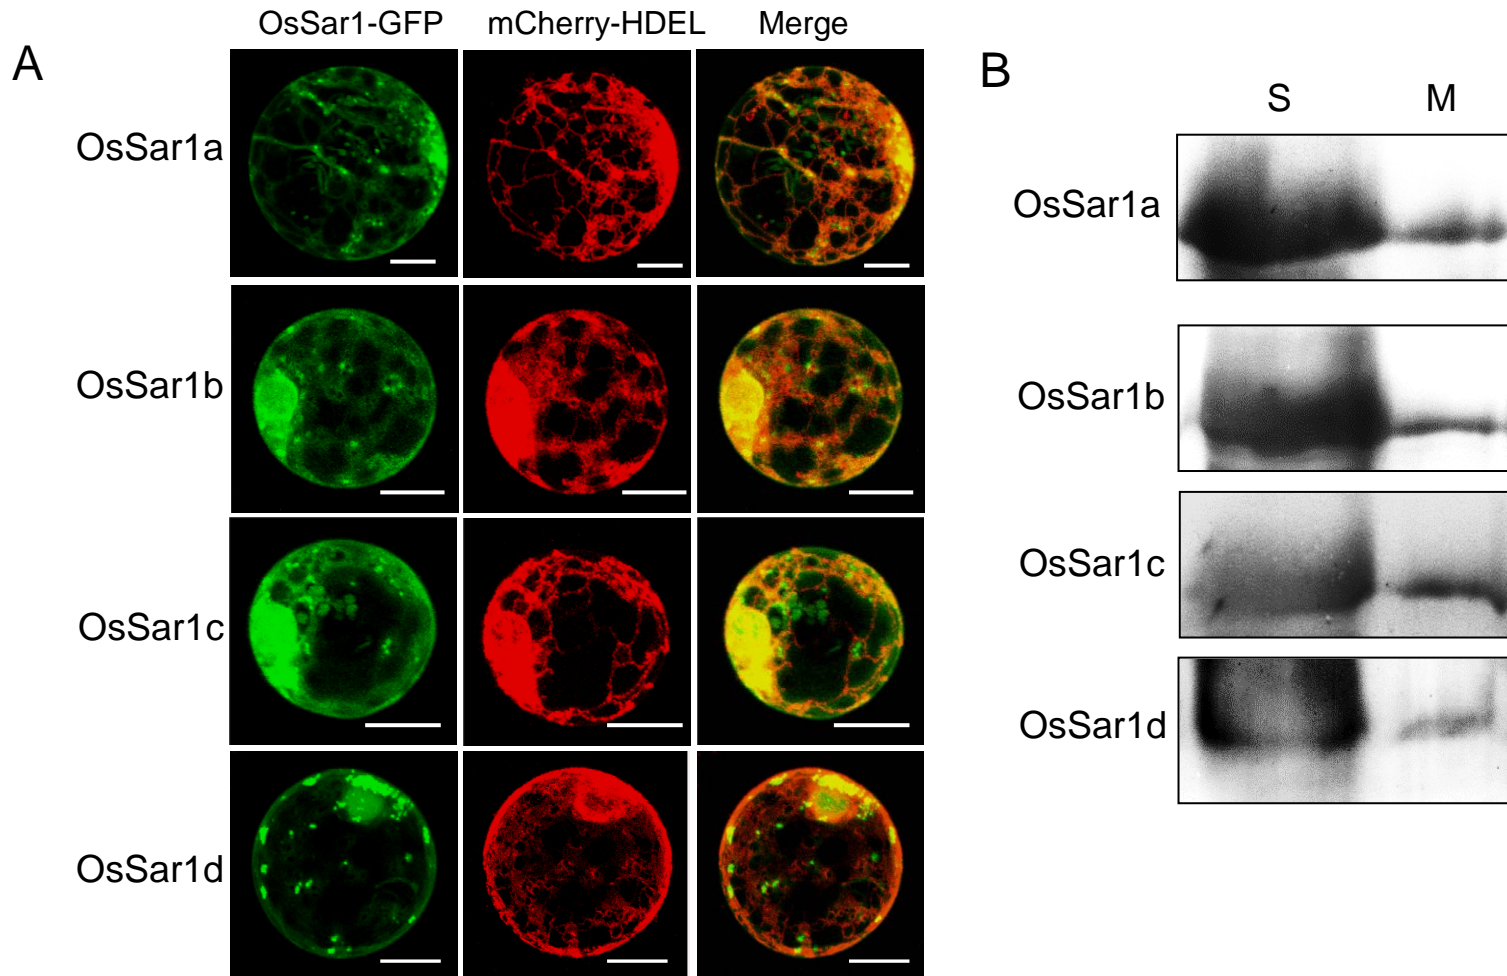

Supplementary Figure S1. Distribution of OsSar1 in rice protoplasts. A, Rice protoplasts were co-transformed OsSar1a/b/c/d-GFP with ER marker protein mCherry-HDEL. B, The soluble (S) and cell membranes (M) proteins were extracted from the OsSar1a/b/c/d-GFP expressed protoplasts. Equal volumes of each extract were separated by SDS-PAGE gels and subjected to western-blot using GFP antibody. Bars =10  $\mu$ m.

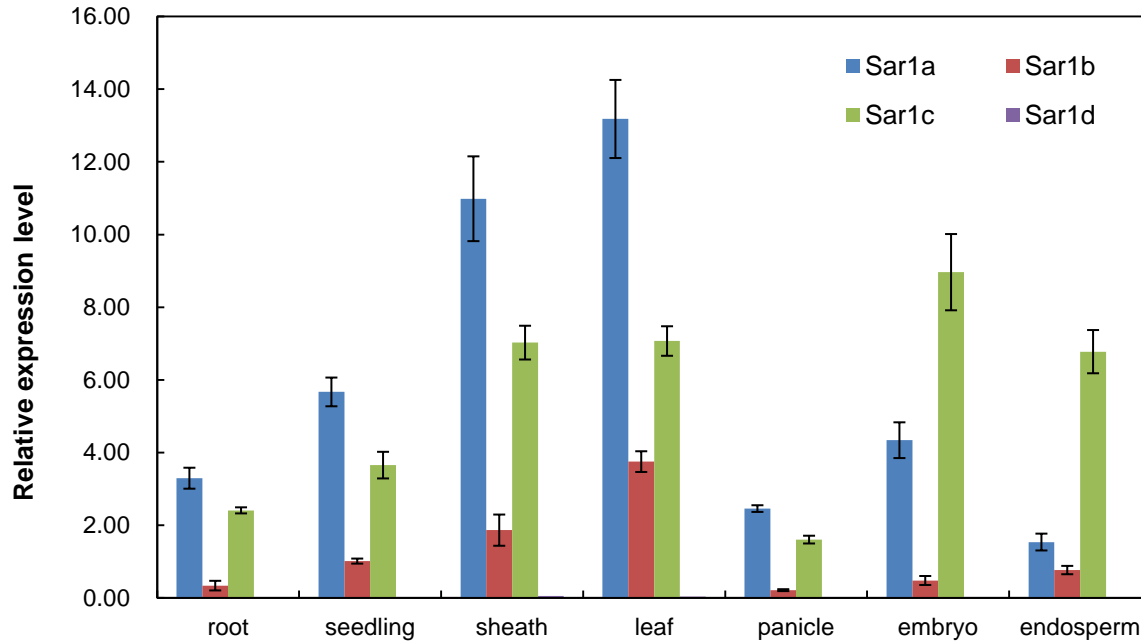

Supplementary Figure S2. The qRT-PCR analysis of relative mRNA expression of *OsSar1a*, *b*, *c*, *d* in rice tissue. The RNA were extracted from root, seedling, leaf sheath, mature leaves, panicles, embryo and endosperm of 15 DAF. The rice *Actin-1* gene was used as the endogenous control.

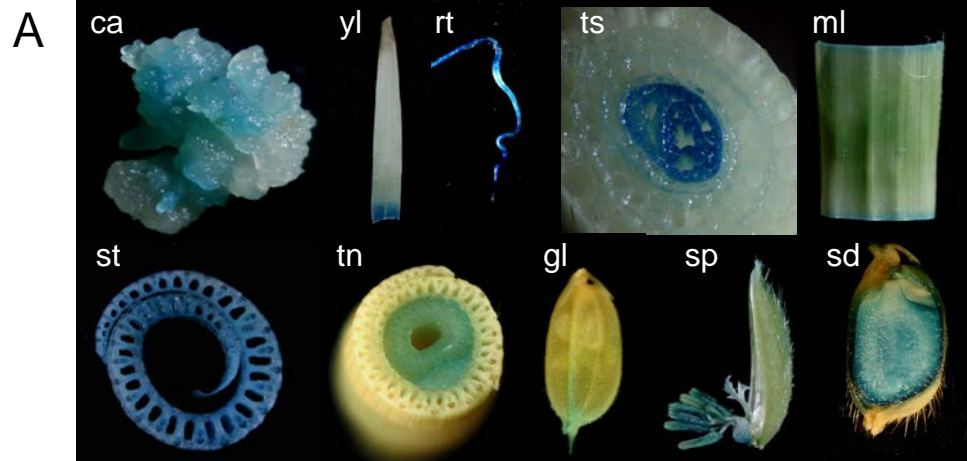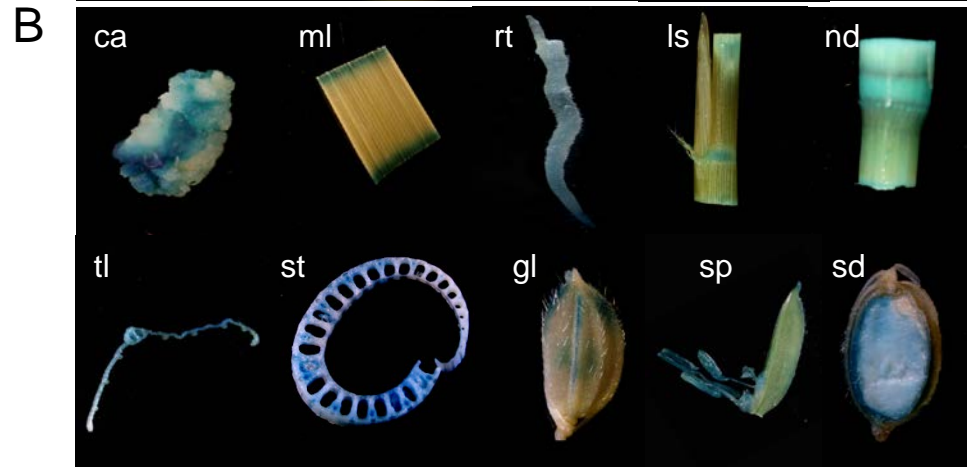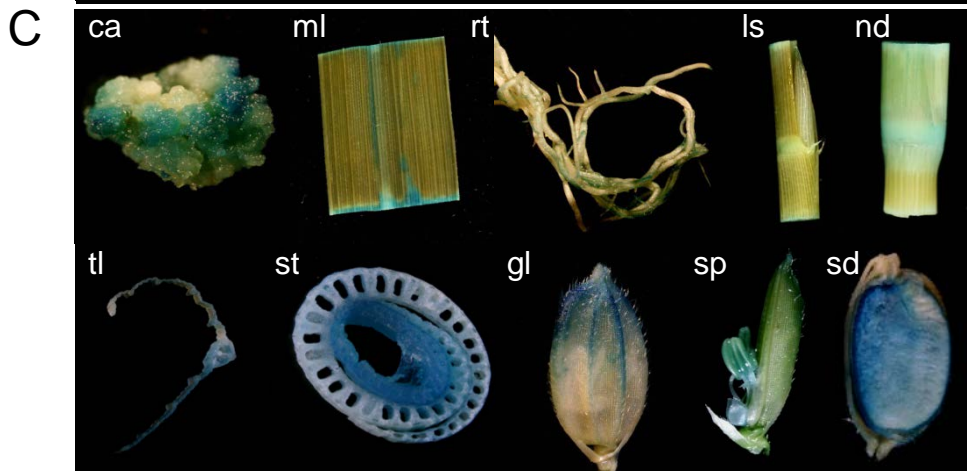

Supplementary Figure S3. Expression pattern of OsSar1 in rice. GUS staining of tissue from (A) *OsSar1apro::GUS*, (B) *OsSar1bpro::GUS* and (C) *OsSar1cpro::GUS* transgenic lines. ca, callus; rt, root; yl, young leaf; ml, mature leaf; tl, transverse section of mature leaf; ls, leaf sheath; ts, transverse section of sheath; nd, node; tn, transverse section of a node; st, stem; gl, glume; sp, stamen and pistil; sd, seed.

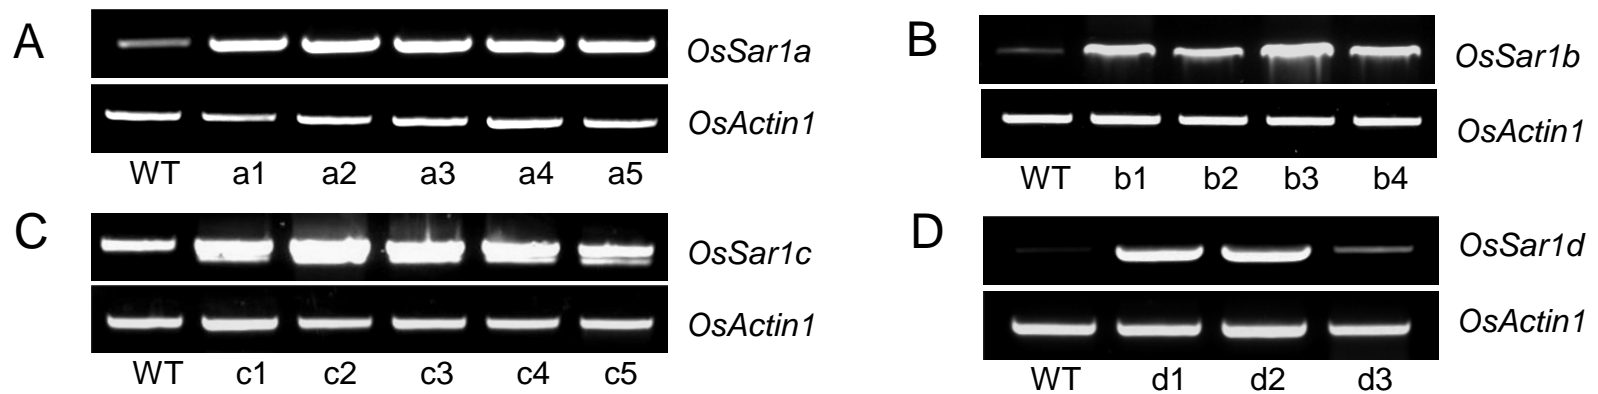

Supplementary Figure S4. RT-PCR analysis of mRNA expression of *OsSar1* in wild type (WT) and overexpression transgenic seeds. A, B, C, D is the detection *OsSar1a*, *OsSar1b*, *OsSar1c* and *OsSar1d* over-expressed lines respectively. *OsActin1* is used as a control.

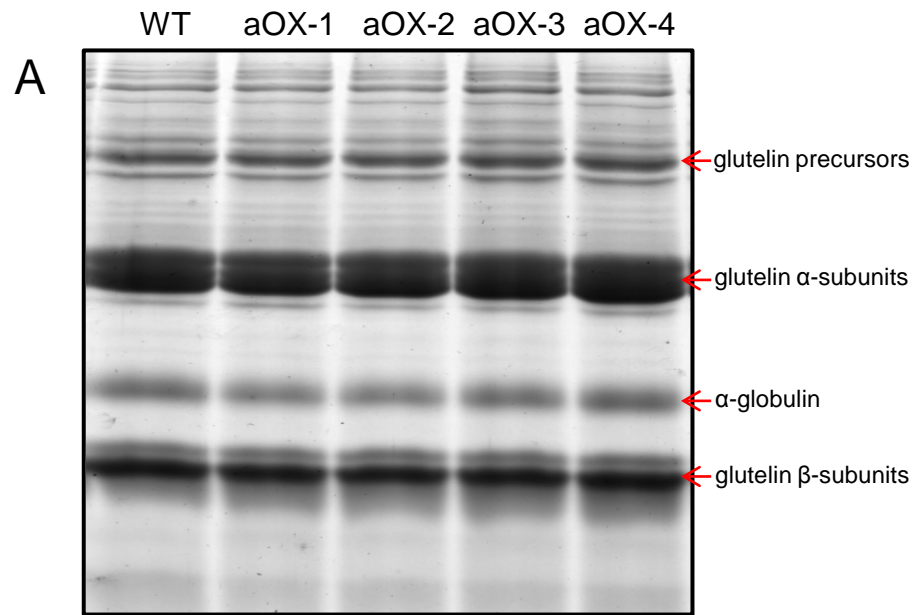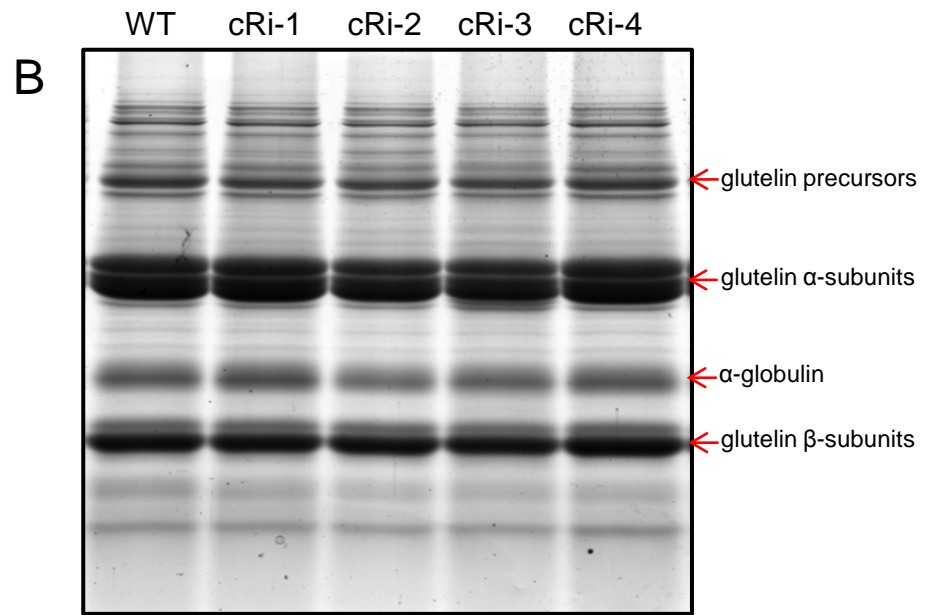

Supplementary Figure S5. SDS-PAGE of total seed protein level in *OsSar1a* overexpression lines (A) and *OsSar1c* RNAi lines (B).

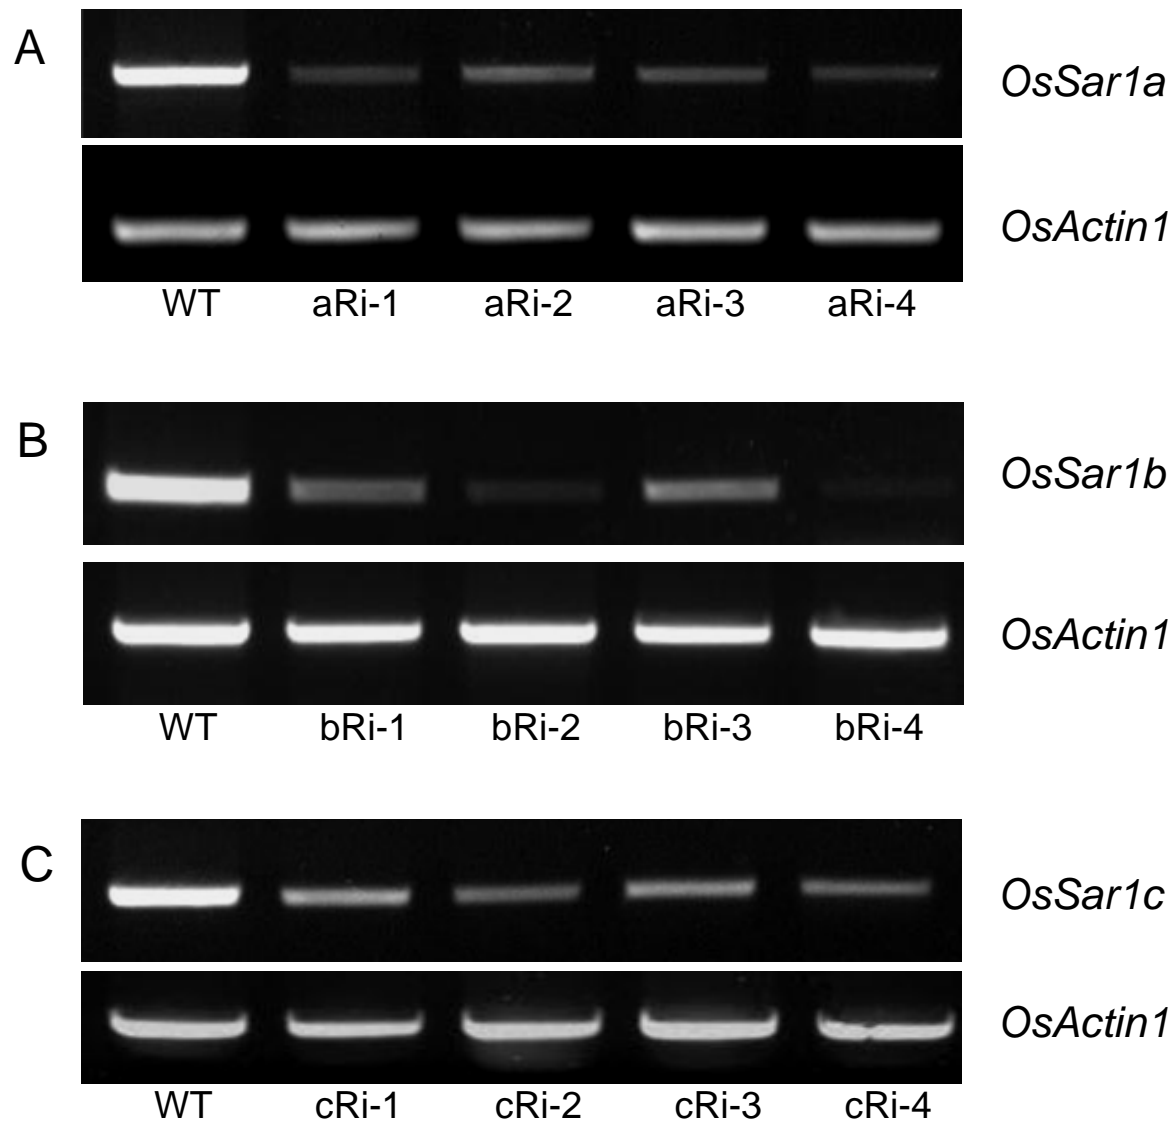

Supplementary Figure S6. RT-PCR analysis of mRNA expression of *OsSar1a* (A), *OsSar1b* (B) and *OsSar1c* (C) in seeds of relative RNAi transgenic lines. *OsActin1* is used as a control.



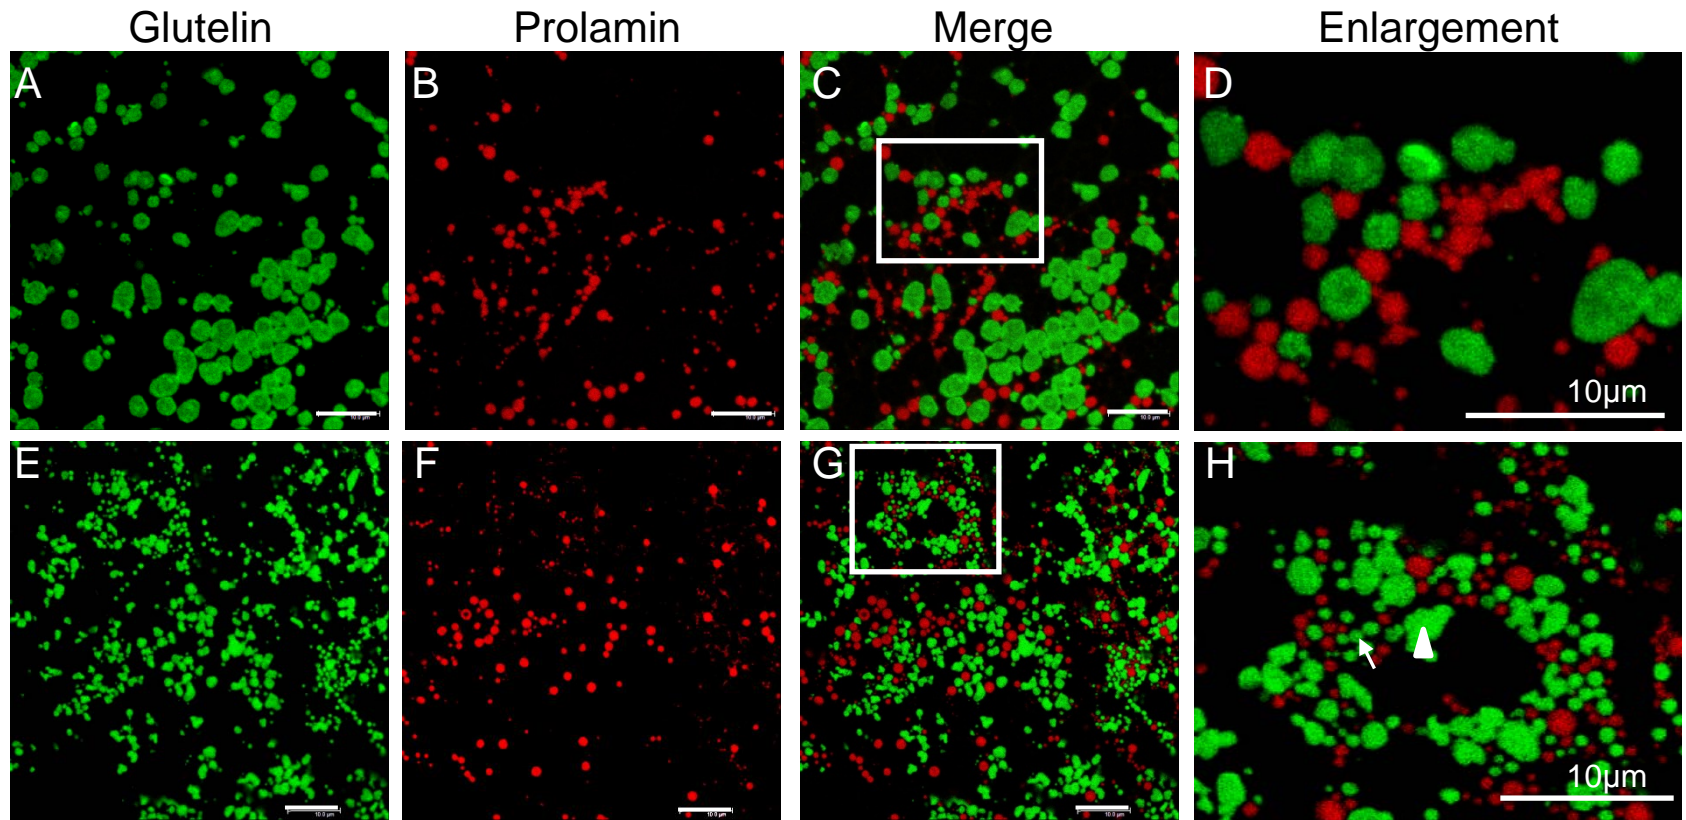

Supplementary Figure S7. Immunofluorescence analysis of glutelin and prolamin in rice endosperm. Secondary antibodies labeled with FITC (green, A and E) and rhodamine (red, B and F) were used to visualize glutelin and prolamin, respectively, in wild type (A-D) and *OsSar1abc* RNAi (E-H). C, G are merged images, (D, H) are enlarged images of the boxed areas in (C, G). The white arrowhead indicates the normal protein body II (PB-II) and white arrow indicates the small novel protein body. Bars = 10  $\mu$ m.

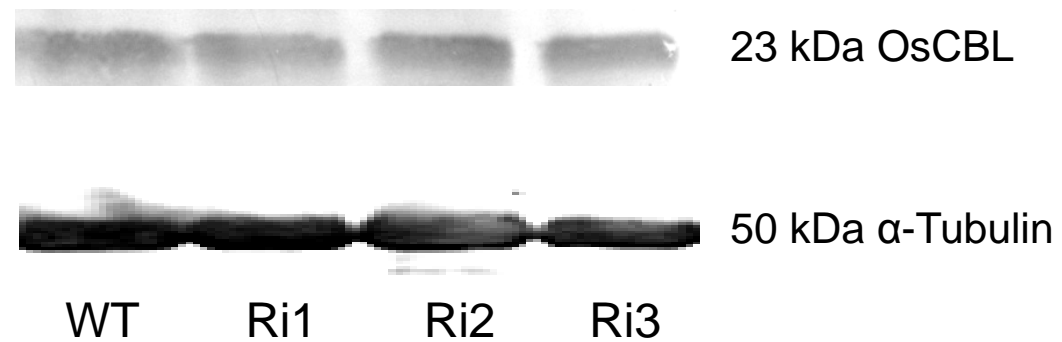

Supplementary Figure S8. Western blot analysis of protein levels of OsCBL in *OsSar1abc* RNAi transformant seeds. The  $\alpha$ -tubulin was used as a loading control.



**Supplementary Table S1** Primer sequences used in this study

| Experiment               | Primer name    | Sequence                                       |
|--------------------------|----------------|------------------------------------------------|
| Subcellular Localization | Sar1a-GFP-F    | 5'-GCTCTAGAATGTTCTGTGGGACTGGTT-3'              |
|                          | Sar1a-GFP-R    | 5'-CTTGATGTACTGGGAGACCC-3'                     |
|                          | Sar1b-GFP-F    | 5'-GCTCTAGAATGTTCTGGTGGACTGGTT-3'              |
|                          | Sar1b-GFP-R    | 5'-CTTGATGTACTGTGACACCC-3'                     |
|                          | Sar1c-GFP-F    | 5'-GCTCTAGAATGTTCTGGTTGACTGGTT-3'              |
|                          | Sar1c-GFP-R    | 5'-TTTGATGTACTGGGACATCC-3'                     |
|                          | Sar1d-GFP-F    | 5'-GCTCTAGAATGTCGTTTCTGCTGGATTG-3'             |
|                          | Sar1d-GFP-R    | 5'-CTTGATGTACTGTGACATCCACC-3'                  |
| Expression pattern       | Sar1a-GUS-F    | 5'-CCCAAGCTTTCGGCTGTCTCTCGCTTTAG-3'            |
|                          | Sar1a-GUS-R    | 5'-ACGCGTCGACCTTCTCTCCCCACGCCTCTT-3'           |
|                          | Sar1b-GUS-F    | 5'-ACGCGTCGACCCAGCAAGTAAAAGAGAAGC-3'           |
|                          | Sar1b-GUS-R    | 5'-ACGCGTCGAC GGAGGAGAGGAAGAAGAAGGGT-3'        |
|                          | Sar1c-GUS-F    | 5'-CCCAAGCTTGACGGCCAGAGTCACCTAACGAGG-3'        |
|                          | Sar1c-GUS-R    | 5'-TCCCCCGGGCTCCGGCGATCCCCCTCCCCG-3'           |
|                          | Sar1d-GUS-F    | 5'-CCCAAGCTTTCGGTTCGGCTATTTTTTCTAC-3'          |
|                          | Sar1d-GUS-R    | 5'-ACGCGTCGACCTCCAGGTATGTTATGTTCTTCTTC-3'      |
| Over-expression          | Sar1a-OX-F     | 5'-ACGCGTCGACATGTTCTGTGGGACTGGTT-3'            |
|                          | Sar1a-OX-R     | 5'-CTACTTGATGTACTGGGAGAC-3'                    |
|                          | Sar1b-OX-F     | 5'-TCCCCCGGGATGTTCTGTGGGACTGGTT-3'             |
|                          | Sar1b-OX-R     | 5'-CTACTTGATGTACTGTGACACCC-3'                  |
|                          | Sar1c-OX-F     | 5'-GCGTCGACATGTTCTGTGGTTGACTGGTT-3'            |
|                          | Sar1c-OX-R     | 5'-CGAGCTCTCATTTGATGTACTGGGACA-3'              |
|                          | Sar1d-OX-F     | 5'-GCGTCGACATGTCGTTTCTGCTGGATTG-3'             |
|                          | Sar1d-OX-R     | 5'-CGAGCTCCTACTTGATGTACTGTGACATCC-3'           |
| Knock-down (RNAi)        | Sar1a-RNAi-F   | 5'-GGGGTACCACTAGTATCCCTTGTC AAGACATACTTGC-3'   |
|                          | Sar1a-RNAi-R   | 5'-CGGGATCCGAGCTCGCAGCAATCCATAAGCAAA-3'        |
|                          | Sar1b-RNAi-F   | 5'-GGGGTACCACTAGTGGTGTGTTAGTTTTTGTCTG-3'       |
|                          | Sar1b-RNAi-R   | 5'-CGGGATCCGAGCTCGATGTTTCTATATCTTTAAAAGTCAC-3' |
|                          | Sar1c-RNAi-F   | 5'-GGGGTACCACTAGTGGGGCTTCTGCTCCTCAATT-3'       |
|                          | Sar1c-RNAi-R   | 5'-CGGGATCCGAGCTCAGCAGCCAAGAGACCGAAG-3'        |
|                          | Sar1abc-RNAi-F | 5'-GGGGTACCACTAGTCAGAAGGAGGCCAAGATCC-3'        |
|                          | Sar1abc-RNAi-R | 5'-CGGGATCCGAGCTCGGTTACGTTGCCCTTACC-3'         |
| qRT-PCR                  | Sar1a-Q-F      | 5'-AGTGTTGTCCGCAAGATGGG-3'                     |
|                          | Sar1a-Q-R      | 5'-CGCTGGGCAGAGTATGCAAG-3'                     |
|                          | Sar1b-Q-F      | 5'-GCAAGATGGGCTATGGGGA-3'                      |
|                          | Sar1b-Q-R      | 5'-TGGTAAGGTGAAACAGGAGTATGAAC-3'               |
|                          | Sar1c-Q-F      | 5'-GCGTCGTCCGCAAGATG-3'                        |
|                          | Sar1c-Q-R      | 5'-AGGAGAGTTGATAAACAGAACCAGAG-3'               |
|                          | Sar1d-Q-F      | 5'-GCTACGGCGATGGCTTCA-3'                       |
|                          | Sar1d-Q-R      | 5'-CATGCTCTGAGTCTCTACCATGTTTC-3'               |
|                          | Actin-Q-F      | 5'-ACCATGGTGCTGAGCGTTT-3'                      |
|                          | Actin-Q-R      | 5'-CGCAGCTTCCATTCTATGAA-3'                     |
